# Supplementary material
Source: PubMed Central journal article supplement (PMC1326037)
Supplement: plntphys_pp.105.070318_1.pdf [file plntphys_pp.105.070318_1.pdf]

## SUPPLEMENTAL MATERIAL, FIGURE CAPTIONS

### Figure S1.

A, The two independent *AtPP2CA* T-DNA insertion lines *pp2ca-1* and *pp2ca-2* exhibit very similar ABA hypersensitivity in germination assays. Comparison of germination rates of wild-type (Col-0; filled circles), *pp2ca-1* (open triangles) and *pp2ca-2* (open diamonds) seeds exposed to 0, 0.3, 0.5, 1 and 2.5  $\mu$ M ABA at 5 days. Data represent the mean  $\pm$  s.e.m. of  $n = 3$  independent experiments with 36 seeds per genotype and experiment. Error bars are smaller than symbols, if not visible. B and C, Stomatal closing is ABA-hypersensitive in *pp2ca-1* (B) and *pp2ca-2* (C) and ABA-insensitive in *35S::AtPP2CA* plants. Ratios of measurements of stomatal apertures shown in Fig. 5B and Fig. 5C relative to stomatal heights of WT (open bars), *pp2ca-1* (B) and *pp2ca-2* (C) (shaded bars) and PP2CAox (black bars) in response to 1  $\mu$ M and 10  $\mu$ M ABA or no ABA. Data represent the mean of double-blind analyses of  $n = 4$  independent experiments  $\pm$  s.e.m. with 4x 50 stomata per data point for Fig. S1B and the mean of  $n = 2$  independent experiments  $\pm$  s.d. with 2x 50 stomata per data point for Fig. S1C. Stars indicate significant changes between the indicated background and WT (p-value < 0.001).

**Figure S2.** General down-regulation of *PP2Cs* from group A of the *Arabidopsis* *PP2C* family during wild-type seed imbibition. Pre-normalized data from wild-type microarray (ATH1 Genechip; Affymetrix, Santa Clara, CA, USA) experiments from Nakabayashi et al. (2005) during seed imbibition (24 hour-long water treatment) were downloaded (June 2005) from *GENEVESTIGATOR* ([www.genevestigator.ethz.ch](http://www.genevestigator.ethz.ch)) (Zimmermann et al., 2004). Transcripts of the nine following *PP2C* genes *At5g51760* (247723\_at), *At5g57050-ABI2* (247957\_at), *At5g51760* (248428\_at), *At4g26080-ABII* (253994\_at), *At3g11410-AtPP2CA* (259231\_at), *At1g72770-AtP2C-HAB1* (259922\_at), *At1g17550-HAB2* (260712\_at), *At1g07430* (261077\_at), and *At2g29380* (266274\_at) were analyzed and sorted from the highest to the weakest mRNA levels in dry seed using Microsoft Excel. *ACTIN7* (250458\_s\_at) values were included as controls. Error bars represent the standard deviation of two independent experiments (Nakabayashi et al., 2005). Note that

(i) *AtPP2CA* is the second most highly expressed *PP2C* gene from group A in dry seeds and that (ii) *ABII* is the only *PP2C* gene from group A whose mRNA level is not down-regulated during imbibition.

**Figure S3.** Transcription profile of *PP2Cs* from group A of the *Arabidopsis PP2C* family in guard cells in response to ABA treatment. Pre-normalized data from wild-type microarray (Arabidopsis Genome Array; Affymetrix, Santa Clara, CA, USA) experiments from Leonhardt et al. (2004) were downloaded (June 2005; <http://www-biology.ucsd.edu/labs/schroeder/index.html>). Transcript levels of five *PP2C* genes *At5g57050-ABI2* (probe# 17929\_s\_at), *At4g26080-ABII* (15586\_s\_at), *At3g11410-AtPP2CA* (19638\_at), *At1g72770-AtP2C-HABI* (18936\_at) and *At2g29380* (12470\_at) are displayed. Error bars represent the standard deviation of three (guard cells, GC) or two (mesophyll cells, MC) independent experiments (Leonhardt et al., 2004).

## LITERATURE CITED

- Leonhardt N, Kwak JM, Robert N, Waner D, Leonhardt G, Schroeder JI** (2004) Microarray expression analyses of *Arabidopsis* guard cells and isolation of a recessive abscisic acid hypersensitive protein phosphatase 2C mutant. *Plant Cell* **16**: 596-615
- Nakabayashi K, Okamoto M, Koshiba T, Kamiya Y, Nambara E** (2005) Genome-wide profiling of stored mRNA in *Arabidopsis thaliana* seed germination: epigenetic and genetic regulation of transcription in seed. *The Plant Journal* **41**: 697-709
- Zimmermann P, Hirsch-Hoffmann M, Hennig L, Gruissem W** (2004) GENEVESTIGATOR. *Arabidopsis* microarray database and analysis toolbox. *Plant Physiol* **136**: 2621-2632
